# Supplementary material for: Bayesian based reaction optimization for complex continuous gas–liquid–solid reactions
Source: Royal Society of Chemistry journal article supplement (doi:10.1039/d1re00397f), 2021-10-18
Supplement: d1re00397f1.pdf [file d1re00397f1.pdf]

## Electronic Supplementary Information

# Bayesian based reaction optimization for complex continuous gas-liquid-solid reactions

Runzhe Liang,<sup>a,†</sup> Xiaonan Duan,<sup>a,†</sup> Jisong Zhang<sup>a,\*</sup> and Zhihong Yuan<sup>a,\*</sup>

*<sup>a</sup>The State Key Laboratory of Chemical Engineering, Department of Chemical Engineering, Tsinghua University, Beijing 100084, China*

\*Corresponding author. Tel.: +86 62 773017; fax: +86 62 773017.

E-mail address: jis Zhang at tsinghua.edu.cn (J.S. Zhang) and [zhihongyuan@mail.tsinghua.edu.cn](mailto:zhihongyuan@mail.tsinghua.edu.cn) (Z.H. Yuan)

## Table of contents

1. Analysis method
2. Sample chromatographs for the hydrogenation
3. Reaction pathways for the hydrogenation
4. Optimization routes of OVAT, Bayesian And modified Bayesian optimization for the hydrogenation

### 1. Analysis method

The sample is analyzed offline utilizing gas chromatography (Agilent, GC-8860) with an FID detector and an Agilent HP-5 column (length: 30 m, diameter: 0.32 mm, film thickness: 0.25  $\mu\text{m}$ ). The samples are diluted with methanol (molar ratio: 1:5) and measured under the following conditions: the injection temperature, 280 °C; the column temperature, 50 ~ 110 °C, 20 °C/min, 110 ~ 150 °C, 10 °C/min, 150 °C, 4 min, 150 ~ 250 °C, 20 °C/min; the detector temperature, 280 °C. The sample volume for all analysis was 1  $\mu\text{L}$ . Based on these analytical conditions, the retention times of the reactants and products are as following: aniline: 3.6 min, nitrobenzene: 4.7 min, dichloroaniline: 5.8 min; 3,4-dichloronitrobenzene: 7.8 min; 3,4-dichloroaniline: 8.5 min; 5-aminotetrahydroisoquinoline: 11.5 min, 5-aminoisoquinoline: 12.2 min, 5-nitroisoquinoline: 12.5 min, azoxy compound (hydrogenation of 3,4-dichloronitrobenzene): 13.3 min, azoxy compound (hydrogenation of 5-nitroisoquinoline): 16.2 min.

### 2. Sample chromatographs for the hydrogenation

The sample chromatographs for the hydrogenation of nitrobenzene, 3,4-

chloronitrobenzene and 5-nitroisoquinoline are shown in Figure S1, Figure S2 and Figure S3 respectively.

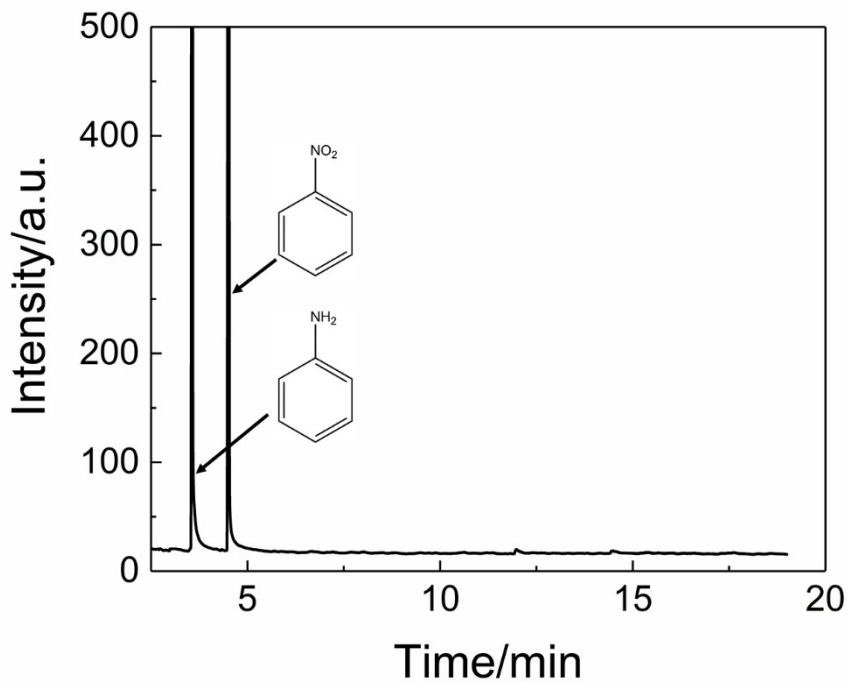

**Figure S1** The sample chromatography for the hydrogenation of nitrobenzene.

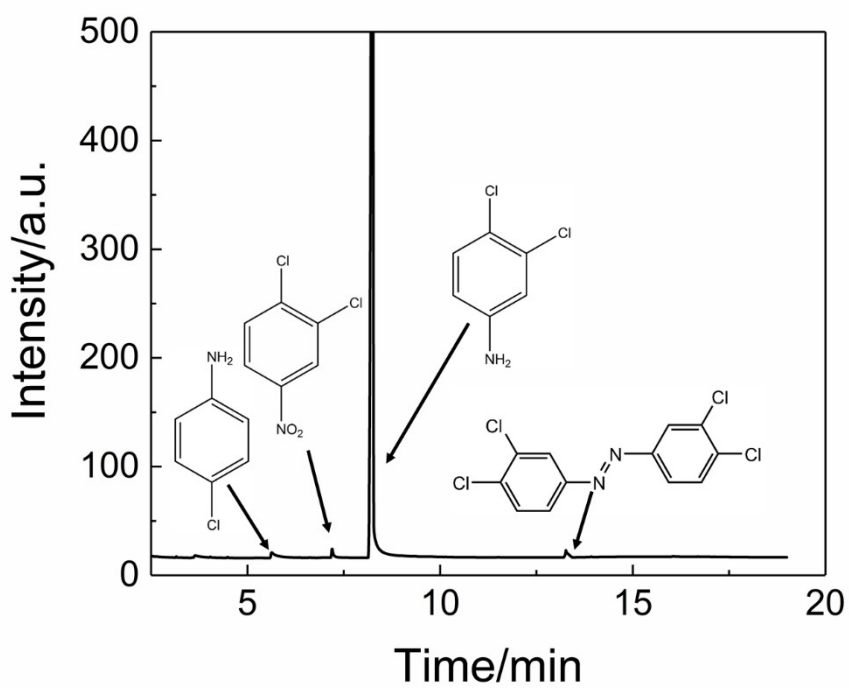

**Figure S2** The sample chromatography for the hydrogenation of 3,4-dichloronitrobenzene

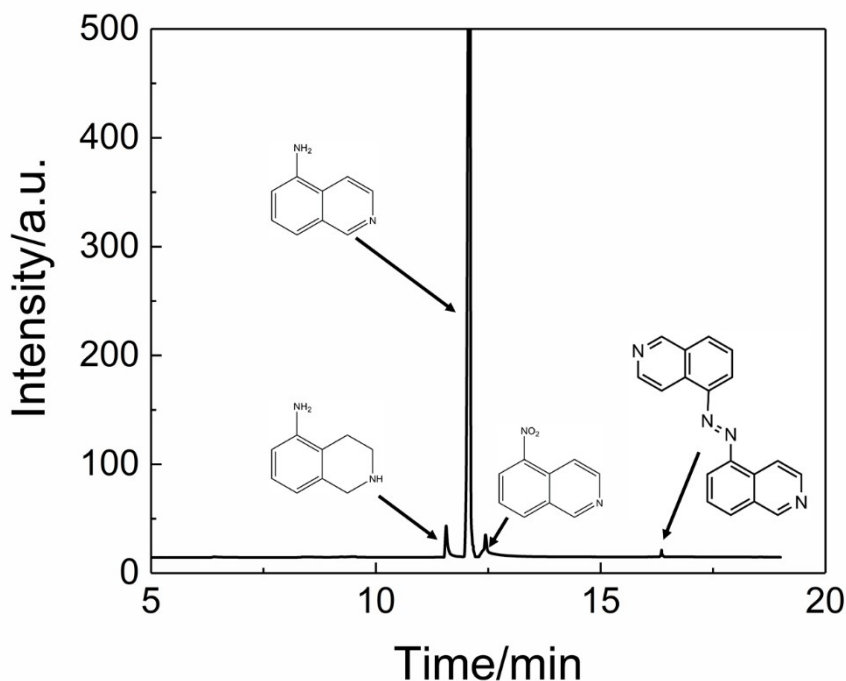

**Figure S3** The sample chromatography for the hydrogenation of 5-nitroisoquinoline

### 3. Reaction pathways for the hydrogenation

For the hydrogenation of 3,4-dichloronitrobenzene, the reduction of 3,4-dichloronitrobenzene proceeds via the nitroso compound and hydroxylamine to 3,4-dichloroaniline. Dehalogenation of the nitro raw material is possible to occur at any step during the reaction pathway, but the dehalogenation of the more electron-rich product (3,4-dichloroaniline) is commonly faster. Another pathway can accrue from condensation of these intermediates. For instance, nitroso and hydroxylamine intermediates can condense to form azoxy compounds. Besides, nitroso intermediate can also react with 3,4-dichloroaniline to form diazo compound. These compounds could be reduced to 3,4-dichloroaniline through a hydrazo intermediate, and the complex reaction pathways are depicted in Scheme S1.

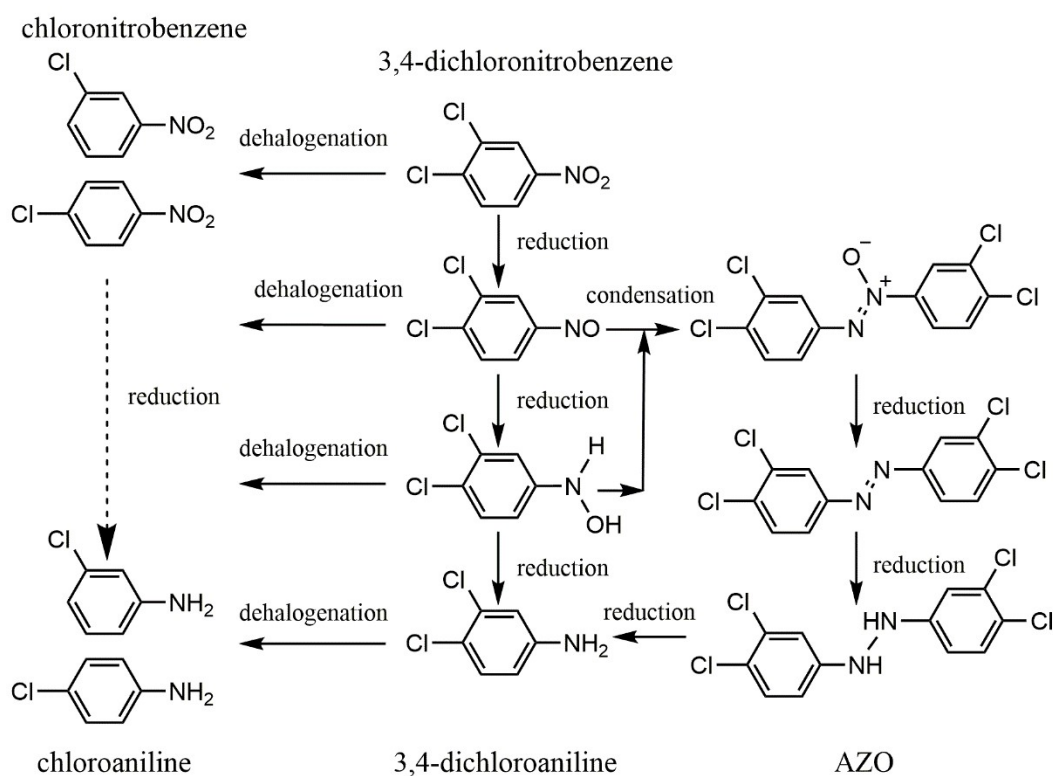

**Scheme S1** The reaction pathway for the hydrogenation of 3,4-dichloronitrobenzene

While for the synthesis of 5-aminoisoquinoline, the over hydrogenation of pyridine may also appear during the reaction process except for the similar pathway described in the hydrogenation of 3,4-dichloronitrobenzene, and the reaction mechanism of 5-nitroisoquinoline is depicted as Scheme S2.

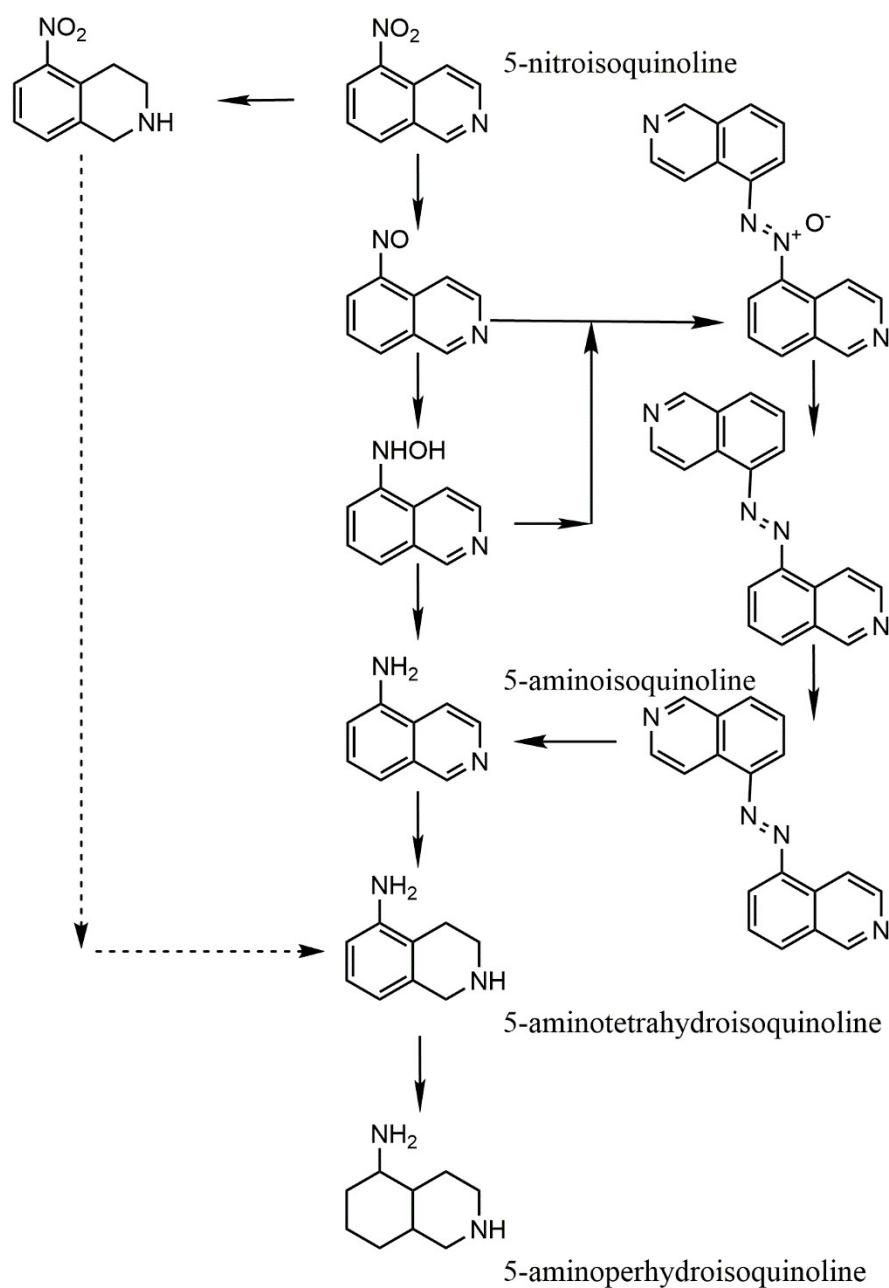

**Scheme S2** The reaction pathway for the hydrogenation of 5-nitroisoquinoline

#### 4. Optimization routes of OVAT and Bayesian optimization for the hydrogenation

Optimization routes proposed by OVAT and Bayesian optimization of the hydrogenation of nitrobenzene, 3,4-dichloronitrobenzene and 5-nitroisoquinoline are listed in Table S1 – S6, respectively.

**Table S1** The OVAT optimization route for the hydrogenation of nitrobenzene

| Experiment number | Temperature /°C | Hydrogen pressure /MPa | Liquid flow rate /mL/min | Conversion /% | Selectivity of aniline /% | Yield of aniline /% |
|-------------------|-----------------|------------------------|--------------------------|---------------|---------------------------|---------------------|
| 1                 | 30.0            | 1.0                    | 1.4                      | 51.2          | 100.0                     | 51.2                |
| 2                 | 35.0            | 1.0                    | 1.4                      | 58.5          | 100.0                     | 58.5                |
| 3                 | 40.0            | 1.0                    | 1.4                      | 66.6          | 100.0                     | 66.6                |
| 4                 | 45.0            | 1.0                    | 1.4                      | 69.1          | 100.0                     | 69.1                |
| 5                 | 50.0            | 1.0                    | 1.4                      | 74.5          | 100.0                     | 74.5                |
| 6                 | 40.0            | 1.0                    | 0.6                      | 91.9          | 100.0                     | 91.9                |
| 7                 | 40.0            | 1.0                    | 0.8                      | 85.7          | 100.0                     | 85.7                |
| 8                 | 40.0            | 1.0                    | 1.0                      | 77.4          | 100.0                     | 77.4                |
| 9                 | 40.0            | 1.0                    | 1.2                      | 71.8          | 100.0                     | 71.8                |
| 10                | 40.0            | 1.0                    | 1.4                      | 64.7          | 100.0                     | 64.7                |
| 11                | 40.0            | 0.5                    | 1.0                      | 55.4          | 100.0                     | 55.4                |
| 12                | 40.0            | 1.0                    | 1.0                      | 75.4          | 100.0                     | 75.4                |
| 13                | 40.0            | 1.5                    | 1.0                      | 90.4          | 100.0                     | 90.4                |
| 14                | 40.0            | 2.0                    | 1.0                      | 94.5          | 100.0                     | 94.5                |
| 15                | 40.0            | 2.5                    | 1.0                      | 98.5          | 100.0                     | 98.5                |

Reaction conditions: initial concentration: 0.2 mol/L, solvent: methanol, gas flow rate: 20 mL/min, catalyst: 0.5 wt% Pd/Al<sub>2</sub>O<sub>3</sub>, catalyst loading: 0.34 g (diluted by 1.36 g Al<sub>2</sub>O<sub>3</sub>).

**Table S2** Bayesian optimization route for the hydrogenation of nitrobenzene

| Experiment number | Temperature /°C | Hydrogen pressure /MPa | Liquid flow rate /mL/min | Conversion /% | Selectivity of aniline /% | Yield of aniline /% |
|-------------------|-----------------|------------------------|--------------------------|---------------|---------------------------|---------------------|
| 1                 | 30.0            | 1.0                    | 1.0                      | 68.1          | 100.0                     | 68.1                |
| 2                 | 40.0            | 1.0                    | 1.0                      | 75.4          | 100.0                     | 75.4                |
| 3                 | 50.0            | 1.0                    | 1.0                      | 85.5          | 100.0                     | 85.5                |
| 4                 | 40.0            | 0.5                    | 1.0                      | 55.4          | 100.0                     | 55.4                |
| 5                 | 40.0            | 2.5                    | 1.0                      | 98.5          | 100.0                     | 98.5                |
| 6                 | 40.0            | 1.0                    | 0.6                      | 91.9          | 100.0                     | 91.9                |
| 7                 | 40.0            | 1.0                    | 1.6                      | 61.0          | 100.0                     | 61.0                |
| 8                 | 44.8            | 2.5                    | 0.6                      | 99.8          | 99.1                      | 98.9                |
| 9                 | 35.1            | 2.5                    | 0.6                      | 99.7          | 100.0                     | 99.7                |

Reaction conditions: initial concentration: 0.2 mol/L, solvent: methanol, gas flow rate: 20 mL/min, catalyst: 0.5 wt% Pd/Al<sub>2</sub>O<sub>3</sub>, catalyst loading: 0.34 g (diluted by 1.36 g Al<sub>2</sub>O<sub>3</sub>).



**Table S3** The proposed Bayesian based optimization route for the hydrogenation of nitrobenzene

|                    | Experiment number | Temperature/ °C | Hydrogen pressure /MPa | Liquid flow rate /mL/min | Conversion /% | Selectivity of aniline /% | Yield of aniline /% |
|--------------------|-------------------|-----------------|------------------------|--------------------------|---------------|---------------------------|---------------------|
| Initial simplex    | 1                 | 40.0            | 1.0                    | 1.0                      | 77.4          | 100.0                     | 77.4                |
|                    | 2                 | 44.0            | 1.0                    | 1.0                      | 92.2          | 100.0                     | 92.2                |
|                    | 3                 | 40.0            | 1.5                    | 1.0                      | 90.4          | 100.0                     | 90.4                |
|                    | 4                 | 40.0            | 1.0                    | 1.2                      | 71.8          | 100.0                     | 71.8                |
| Local optimization | 5                 | 42.7            | 1.3                    | 0.8                      | 99.1          | 100.0                     | 99.1                |
|                    | 6                 | 44.1            | 1.4                    | 0.6                      | 99.6          | 100.0                     | 99.6                |
|                    | 7                 | 45.4            | 1.6                    | 0.7                      | 99.7          | 100.0                     | 99.7                |

Reaction conditions: initial concentration: 0.2 mol/L, solvent: methanol, gas flow rate: 20 mL/min, catalyst: 0.5 wt% Pd/Al<sub>2</sub>O<sub>3</sub>, catalyst loading: 0.34 g (diluted by 1.36 g Al<sub>2</sub>O<sub>3</sub>).

**Table S4** The OVAT optimization route for the hydrogenation of 3,4-dichloronitrobenzene

| Experiment number | Temperature /°C | Hydrogen pressure /MPa | Liquid flow rate /mL/min | Conversion /% | Selectivity /% | Yield of 3,4-dichloroaniline /% |
|-------------------|-----------------|------------------------|--------------------------|---------------|----------------|---------------------------------|
| 1                 | 40.0            | 2.0                    | 0.30                     | 74.7          | 92.0           | 68.7                            |
| 2                 | 50.0            | 2.0                    | 0.30                     | 96.1          | 94.6           | 90.9                            |
| 3                 | 60.0            | 2.0                    | 0.30                     | 100.0         | 94.9           | 94.9                            |
| 4                 | 70.0            | 2.0                    | 0.30                     | 100.0         | 97.4           | 96.4                            |
| 5                 | 80.0            | 2.0                    | 0.30                     | 100.0         | 93.0           | 93.0                            |
| 6                 | 60.0            | 2.0                    | 0.20                     | 100.0         | 96.7           | 96.7                            |
| 7                 | 60.0            | 2.0                    | 0.25                     | 100.0         | 98.6           | 98.6                            |
| 8                 | 60.0            | 2.0                    | 0.30                     | 94.3          | 96.8           | 91.3                            |
| 9                 | 60.0            | 2.0                    | 0.35                     | 69.8          | 96.1           | 67.1                            |
| 10                | 60.0            | 2.0                    | 0.40                     | 56.4          | 92.2           | 52.0                            |
| 11                | 60.0            | 1.0                    | 0.30                     | 89.8          | 93.3           | 83.8                            |
| 12                | 60.0            | 1.5                    | 0.30                     | 90.7          | 93.9           | 85.2                            |
| 13                | 60.0            | 2.0                    | 0.30                     | 96.5          | 98.1           | 94.7                            |
| 14                | 60.0            | 2.5                    | 0.30                     | 97.4          | 98.0           | 95.5                            |
| 15                | 60.0            | 3.0                    | 0.30                     | 100.0         | 96.8           | 96.8                            |

Reaction conditions: initial concentration: 0.39 mol/L, solvent: methanol, gas flow rate: 20 mL/min, catalyst: 20 wt% Ni/SiO<sub>2</sub>, catalyst loading: 1.88 g.

**Table S5** Bayesian optimization route for the hydrogenation of 3,4-dichloronitrobenzene

| Experiment number | Temperature /°C | Hydrogen pressure /MPa | Liquid flow rate /mL/min | Conversion /% | Selectivity /% | Yield of 3,4-dichloroaniline /% |
|-------------------|-----------------|------------------------|--------------------------|---------------|----------------|---------------------------------|
| 1                 | 40.0            | 2.0                    | 0.30                     | 74.7          | 92.0           | 68.7                            |
| 2                 | 60.0            | 2.0                    | 0.30                     | 100.0         | 94.9           | 94.9                            |
| 3                 | 80.0            | 2.0                    | 0.30                     | 100.0         | 93.0           | 93.0                            |
| 4                 | 60.0            | 2.0                    | 0.20                     | 100.0         | 96.7           | 96.7                            |
| 5                 | 60.0            | 2.0                    | 0.40                     | 56.4          | 92.2           | 52.0                            |
| 6                 | 60.0            | 1.0                    | 0.30                     | 89.8          | 93.3           | 83.8                            |
| 7                 | 60.0            | 3.0                    | 0.30                     | 100.0         | 96.8           | 96.8                            |
| 8                 | 60.0            | 2.5                    | 0.20                     | 100.0         | 93.6           | 93.6                            |
| 9                 | 59.6            | 2.8                    | 0.20                     | 100.0         | 92.4           | 92.4                            |
| 10                | 59.5            | 2.2                    | 0.20                     | 100.0         | 94.3           | 94.3                            |
| 11                | 53.3            | 1.7                    | 0.23                     | 99.7          | 98.5           | 98.2                            |
| 12                | 52.3            | 1.5                    | 0.25                     | 99.5          | 96.6           | 96.1                            |
| 13                | 75.4            | 2.9                    | 0.30                     | 100.0         | 83.0           | 83.0                            |
| 14                | 52.8            | 1.4                    | 0.34                     | 99.3          | 91.6           | 91.0                            |
| 15                | 52.7            | 1.9                    | 0.22                     | 100.0         | 98.3           | 98.3                            |
| 16                | 53.2            | 2.3                    | 0.40                     | 90.8          | 97.4           | 88.4                            |
| 17                | 59.5            | 1.4                    | 0.30                     | 99.5          | 97.9           | 97.4                            |
| 18                | 59.0            | 1.7                    | 0.34                     | 100.0         | 98.0           | 98.0                            |

Reaction conditions: initial concentration: 0.39 mol/L, solvent: methanol, gas flow rate: 20 mL/min, catalyst: 20 wt% Ni/SiO<sub>2</sub>, catalyst loading: 1.88 g.

**Table S6** The proposed Bayesian based optimization route for the hydrogenation of 3,4-dichloronitrobenzene

|                     | Experiment number | Temperature /°C | Hydrogen pressure /MPa | Liquid flow rate /mL/min | Conversion /% | Selectivity /% | Yield of 3,4-dichloroaniline /% |
|---------------------|-------------------|-----------------|------------------------|--------------------------|---------------|----------------|---------------------------------|
| Initial simplex     | 1                 | 60.0            | 2.0                    | 0.30                     | 100           | 94.8           | 94.8                            |
|                     | 2                 | 70.0            | 2.0                    | 0.30                     | 100           | 97.4           | 97.4                            |
|                     | 3                 | 60.0            | 2.0                    | 0.35                     | 69.8          | 96.1           | 67.1                            |
|                     | 4                 | 60.0            | 2.5                    | 0.30                     | 100           | 95.5           | 95.5                            |
| Local optimization  | 5                 | 66.7            | 2.3                    | 0.25                     | 100           | 95.6           | 95.6                            |
|                     | 6                 | 71.1            | 2.5                    | 0.27                     | 100           | 93.6           | 93.6                            |
|                     | 7                 | 62.8            | 2.1                    | 0.29                     | 100           | 94.6           | 94.6                            |
|                     | 8                 | 68.3            | 2.4                    | 0.28                     | 100           | 92.4           | 92.4                            |
|                     | 9                 | 64.2            | 2.2                    | 0.29                     | 100           | 94.1           | 94.1                            |
| Global optimization | 10                | 40.0            | 1.0                    | 0.20                     | 73.8          | 95.5           | 70.5                            |
|                     | 11                | 80.0            | 1.0                    | 0.20                     | 100           | 96.7           | 96.7                            |
|                     | 12                | 80.0            | 3.0                    | 0.40                     | 100           | 97.3           | 97.3                            |
|                     | 13                | 80.0            | 3.0                    | 0.20                     | 100           | 94.7           | 94.7                            |
|                     | 14                | 60.4            | 2.2                    | 0.20                     | 100           | 98.9           | 98.9                            |

|    |      |     |      |      |      |      |
|----|------|-----|------|------|------|------|
| 15 | 70.5 | 2.5 | 0.22 | 100  | 99.1 | 99.1 |
| 16 | 70.7 | 1.8 | 0.40 | 99.8 | 98.4 | 98.2 |
| 17 | 67.5 | 2.6 | 0.20 | 100  | 97.9 | 97.9 |
| 18 | 80.0 | 2.0 | 0.31 | 100  | 99.1 | 99.1 |

Reaction conditions: initial concentration: 0.39 mol/L, solvent: methanol, gas flow rate: 20 mL/min, catalyst: 20 wt% Ni/SiO<sub>2</sub>, catalyst loading: 1.88 g.

**Table S7** The OVAT optimization route for the hydrogenation of 5-nitroisoquinoline

| Experiment number | Temperature /°C | Hydrogen pressure /MPa | Liquid flow rate /mL/min | Gas flow rate /mL/min | Conversion /% | Selectivity /% | Yield of 5-aminoisoquinoline /% |
|-------------------|-----------------|------------------------|--------------------------|-----------------------|---------------|----------------|---------------------------------|
| 1                 | 40.0            | 2.0                    | 0.30                     | 20.0                  | 98.1          | 99.1           | 97.2                            |
| 2                 | 50.0            | 2.0                    | 0.30                     | 20.0                  | 99.0          | 93.5           | 92.6                            |
| 3                 | 60.0            | 2.0                    | 0.30                     | 20.0                  | 99.6          | 87.4           | 87.1                            |
| 4                 | 70.0            | 2.0                    | 0.30                     | 20.0                  | 100.0         | 81.6           | 81.6                            |
| 5                 | 80.0            | 2.0                    | 0.30                     | 20.0                  | 100.0         | 76.3           | 76.3                            |
| 6                 | 60.0            | 2.0                    | 0.20                     | 20.0                  | 99.6          | 92.4           | 92.1                            |
| 7                 | 60.0            | 2.0                    | 0.30                     | 20.0                  | 99.8          | 93.7           | 93.4                            |
| 8                 | 60.0            | 2.0                    | 0.40                     | 20.0                  | 100.0         | 95.3           | 95.3                            |
| 9                 | 60.0            | 2.0                    | 0.50                     | 20.0                  | 100.0         | 96.5           | 96.5                            |
| 10                | 60.0            | 2.0                    | 0.60                     | 20.0                  | 100.0         | 97.6           | 97.6                            |

|    |      |     |      |      |       |      |      |
|----|------|-----|------|------|-------|------|------|
| 11 | 60.0 | 2.0 | 0.70 | 20.0 | 99.2  | 98.2 | 97.5 |
| 12 | 60.0 | 2.0 | 0.80 | 20.0 | 99.6  | 98.6 | 98.2 |
| 13 | 60.0 | 2.0 | 0.90 | 20.0 | 100.0 | 98.9 | 98.9 |
| 14 | 60.0 | 2.0 | 1.00 | 20.0 | 98.3  | 99.3 | 97.5 |
| 15 | 60.0 | 2.0 | 1.10 | 20.0 | 96.8  | 99.2 | 96.1 |
| 16 | 60.0 | 1.0 | 0.30 | 20.0 | 98.0  | 97.8 | 95.9 |
| 17 | 60.0 | 1.5 | 0.30 | 20.0 | 98.0  | 97.0 | 95.1 |
| 18 | 60.0 | 2.0 | 0.30 | 20.0 | 100.0 | 94.8 | 94.8 |
| 19 | 60.0 | 2.5 | 0.30 | 20.0 | 100.0 | 94.1 | 94.1 |
| 20 | 60.0 | 3.0 | 0.30 | 20.0 | 100.0 | 93.2 | 93.2 |
| 21 | 60.0 | 2.0 | 0.30 | 15.0 | 100.0 | 94.5 | 94.5 |
| 22 | 60.0 | 2.0 | 0.30 | 20.0 | 99.3  | 93.5 | 92.8 |
| 23 | 60.0 | 2.0 | 0.30 | 25.0 | 99.4  | 93.8 | 93.3 |
| 24 | 60.0 | 2.0 | 0.30 | 30.0 | 99.4  | 94.1 | 93.5 |

Reaction conditions: initial concentration: 0.18 mol/L, solvent: tetrahydrofuran, catalyst: 5 wt% Pt/C, catalyst loading: 0.8 g.

**Table S8** Bayesian optimization route for the hydrogenation of 5-nitroisoquinoline

| Experiment number | Temperature /°C | Hydrogen pressure /MPa | Liquid flow rate /mL/min | Gas flow rate /mL/min | Conversion /% | Selectivity /% | Yield of 5-aminoisoquinoline /% |
|-------------------|-----------------|------------------------|--------------------------|-----------------------|---------------|----------------|---------------------------------|
| 1                 | 40.0            | 2.0                    | 0.30                     | 20.0                  | 99.3          | 97.9           | 97.2                            |

|    |      |     |      |      |       |      |      |
|----|------|-----|------|------|-------|------|------|
| 2  | 60.0 | 2.0 | 0.30 | 20.0 | 100.0 | 93.4 | 93.4 |
| 3  | 60.0 | 2.0 | 0.60 | 20.0 | 100.0 | 97.6 | 97.6 |
| 4  | 80.0 | 2.0 | 0.30 | 20.0 | 100.0 | 76.3 | 76.3 |
| 5  | 60.0 | 1.0 | 0.30 | 20.0 | 100.0 | 95.9 | 95.9 |
| 6  | 60.0 | 3.0 | 0.30 | 20.0 | 100.0 | 93.2 | 93.2 |
| 7  | 60.0 | 2.0 | 0.20 | 20.0 | 100.0 | 92.1 | 92.1 |
| 8  | 60.0 | 2.0 | 1.20 | 20.0 | 98.3  | 94.7 | 93.1 |
| 9  | 60.0 | 2.0 | 0.30 | 15.0 | 100.0 | 94.5 | 94.5 |
| 10 | 60.0 | 2.0 | 0.30 | 30.0 | 100.0 | 93.5 | 93.5 |
| 11 | 48.0 | 1.0 | 1.20 | 15.0 | 94.2  | 92.4 | 87.0 |
| 12 | 60.0 | 1.5 | 0.70 | 20.0 | 100.0 | 94.8 | 94.8 |
| 13 | 40.0 | 2.8 | 0.20 | 27.0 | 99.1  | 98.4 | 97.5 |
| 14 | 47.0 | 1.0 | 1.20 | 30.0 | 97.2  | 92.9 | 90.3 |
| 15 | 40.0 | 2.4 | 0.30 | 26.0 | 99.6  | 98.8 | 98.4 |
| 16 | 40.0 | 2.9 | 1.10 | 23.0 | 93.6  | 90.2 | 84.4 |
| 17 | 40.0 | 2.9 | 0.20 | 26.0 | 100.0 | 95.9 | 95.9 |
| 18 | 41.0 | 2.1 | 0.40 | 27.0 | 100.0 | 96.8 | 96.8 |
| 19 | 40.0 | 1.9 | 0.70 | 27.0 | 100.0 | 97.0 | 97.0 |
| 20 | 40.0 | 1.2 | 0.20 | 26.0 | 100.0 | 95.3 | 95.3 |

---

Reaction conditions: initial concentration: 0.18 mol/L, solvent: tetrahydrofuran, catalyst: 5 wt% Pt/C, catalyst loading: 0.8 g.

**Table S9** The proposed Bayesian based optimization route for the hydrogenation of 5-nitroisoquinoline

|                     | Experiment number | Temperature /°C | Hydrogen pressure /MPa | Liquid flow rate /mL/min | Gas flow rate /mL/min | Conversion /% | Selectivity /% | Yield of 5-aminoisoquinoline /% |
|---------------------|-------------------|-----------------|------------------------|--------------------------|-----------------------|---------------|----------------|---------------------------------|
| Initial simplex     | 1                 | 60.0            | 2.0                    | 0.60                     | 20.0                  | 100.0         | 97.6           | 97.6                            |
|                     | 2                 | 70.0            | 2.0                    | 0.60                     | 20.0                  | 100.0         | 95.2           | 95.2                            |
|                     | 3                 | 60.0            | 2.4                    | 0.60                     | 20.0                  | 100.0         | 98.4           | 98.4                            |
|                     | 4                 | 60.0            | 2.0                    | 0.80                     | 20.0                  | 100.0         | 98.2           | 98.2                            |
|                     | 5                 | 60.0            | 2.0                    | 0.60                     | 25.0                  | 100.0         | 98.5           | 98.5                            |
| Local optimization  | 6                 | 50.0            | 2.2                    | 0.70                     | 22.5                  | 100.0         | 99.4           | 99.4                            |
|                     | 7                 | 40.0            | 2.3                    | 0.75                     | 23.8                  | 99.5          | 99.5           | 99.0                            |
|                     | 8                 | 55.0            | 2.3                    | 0.75                     | 23.8                  | 100.0         | 99.5           | 99.5                            |
|                     | 9                 | 52.5            | 2.5                    | 0.83                     | 25.7                  | 100.0         | 99.5           | 99.5                            |
|                     | 10                | 52.5            | 2.5                    | 0.53                     | 25.7                  | 100.0         | 98.2           | 98.2                            |
|                     | 11                | 54.4            | 2.4                    | 0.60                     | 24.3                  | 100.0         | 98.4           | 98.4                            |
| Global optimization | 12                | 40.0            | 1.8                    | 0.42                     | 15.2                  | 99.7          | 99.2           | 98.9                            |
|                     | 13                | 40.0            | 2.8                    | 1.04                     | 29.9                  | 99.2          | 98.4           | 97.6                            |
|                     | 14                | 40.2            | 1.3                    | 0.57                     | 15.4                  | 100.0         | 99.4           | 99.4                            |
|                     | 15                | 43.2            | 2.7                    | 1.17                     | 15.1                  | 100.0         | 99.3           | 99.3                            |

Reaction conditions: initial concentration: 0.18 mol/L, solvent: tetrahydrofuran, catalyst: 5 wt% Pt/C, catalyst loading: 0.8 g.
